# Supplementary material for: A Phase I Study of KIN-3248, an Irreversible Small-molecule Pan-FGFR Inhibitor, in Patients with Advanced FGFR2/3-driven Solid Tumors
Source: PubMed Central journal article supplement (PMC11060137; doi:10.1158/2767-9764.crc-24-0137), 2024-04-30

## Supplemental Figure 1: Study Schema

**Part A: Dose Escalation**  
N = ~45 participants with advanced tumors  
harboring pertinent FGFR2 and/or FGFR3 gene  
alterations

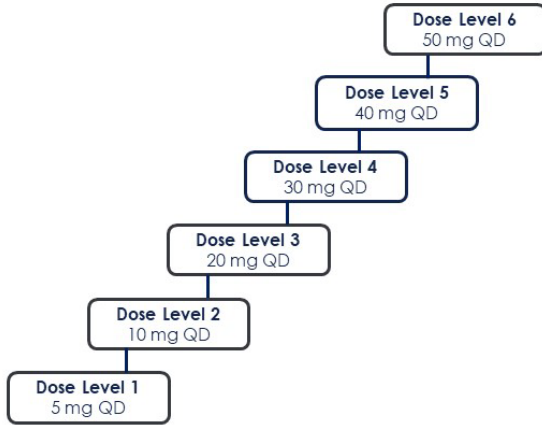

**Part B: Dose Expansion**  
N = ~80

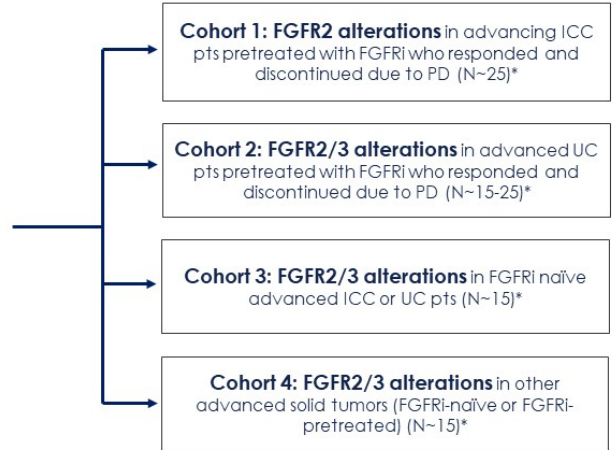

Supplement: crc-24-0137-s02.pdf [file crc-24-0137-s02.pdf]
