# Supplementary material for: A Phase I Study of KIN-3248, an Irreversible Small-molecule Pan-FGFR Inhibitor, in Patients with Advanced FGFR2/3-driven Solid Tumors
Source: PubMed Central journal article supplement (PMC11060137; doi:10.1158/2767-9764.crc-24-0137), 2024-04-30

**Supplemental Figure 2: Mean KIN-3248 Concentrations over time for Asian versus non-Asian Patients.** Mean (SD) plasma KIN-3248 concentration versus time profiles stratified by Asia vs. non-Asia Preliminary data shows PK was generally similar between Asian (China, Taiwan, Korea) versus Western (North America, EU) participants.

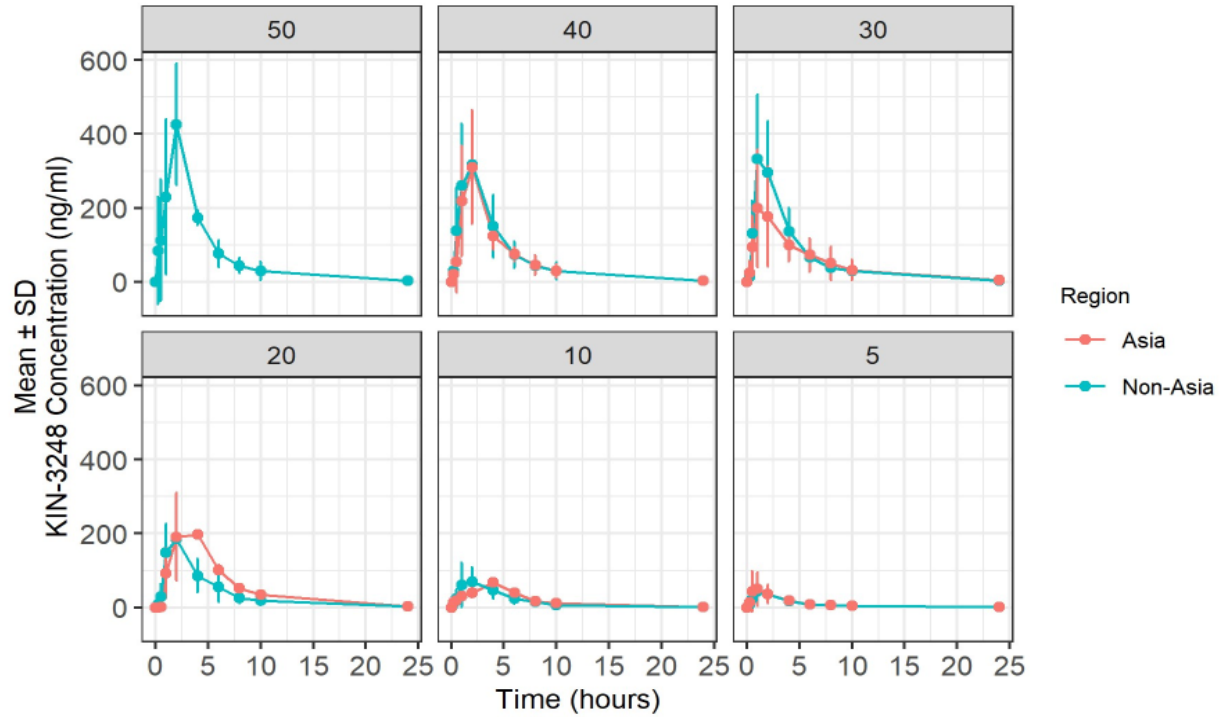

Supplement: crc-24-0137-s03.pdf [file crc-24-0137-s03.pdf]
