# Supplementary material for: A Phase I Study of KIN-3248, an Irreversible Small-molecule Pan-FGFR Inhibitor, in Patients with Advanced FGFR2/3-driven Solid Tumors
Source: PubMed Central journal article supplement (PMC11060137; doi:10.1158/2767-9764.crc-24-0137), 2024-04-30

**Supplemental Figure 5: Somatic Mutation Profiles in Baseline ctDNA.** Somatic mutations identified from ctDNA are presented descriptively as an Oncoplot using maftools package (32) from bioconductor. The oncoplot includes all genes that were altered in  $\geq 4$  patients or actionable oncogenes (OncoKB Level 1) with oncogenic mutations in  $\geq 1$  patient. The TMB stacked barplot shows the number of somatic and non-silent mutations identified in a sample. Amp: ctDNA amplification  $\geq 2.6$ . Amplifications are not counted in the stacked TMB bars on top of the oncoplot. FGFR\_Status indicates whether the FGFR2 or FGFR3 alteration identified locally was confirmed by the baseline ctDNA analysis.

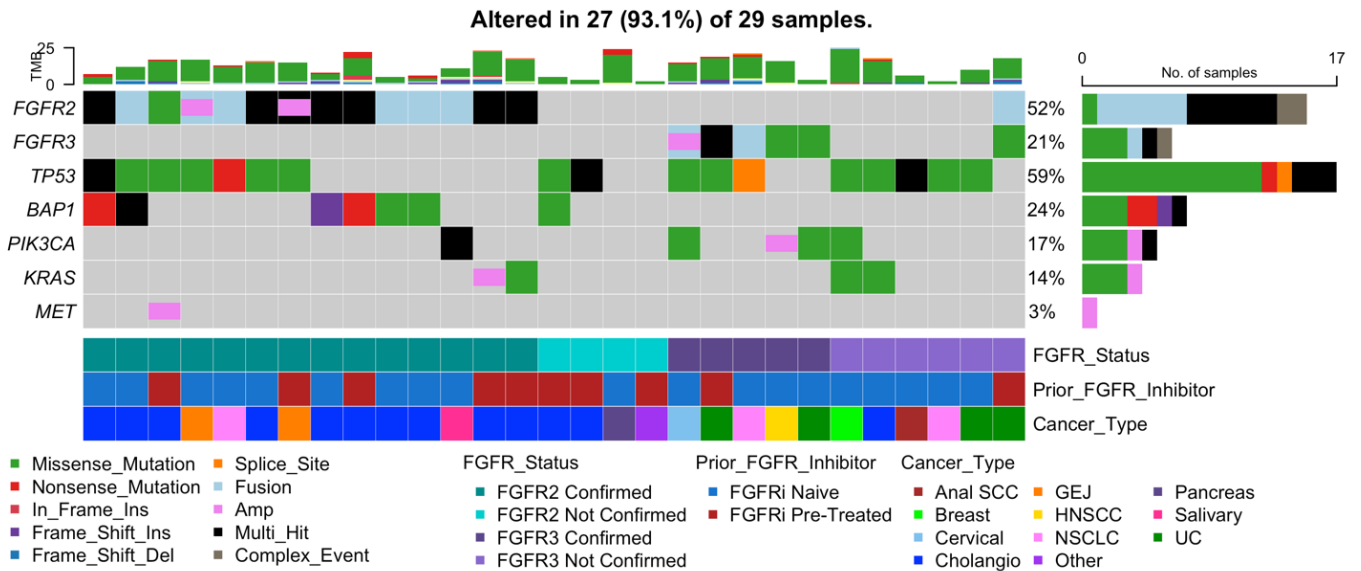

Supplement: crc-24-0137-s06.pdf [file crc-24-0137-s06.pdf]
