# Supplementary material for: A Phase I Study of KIN-3248, an Irreversible Small-molecule Pan-FGFR Inhibitor, in Patients with Advanced FGFR2/3-driven Solid Tumors
Source: PubMed Central journal article supplement (PMC11060137; doi:10.1158/2767-9764.crc-24-0137), 2024-04-30
Supplement: crc-24-0137-s07.pdf [file crc-24-0137-s07.pdf]

**Supplemental Table 1: Pathogenic / Likely-pathogenic FGFR2 Gene Alterations**

| Alteration Type | Functional Description                                               | FGFR2 Alteration |                 |                |
|-----------------|----------------------------------------------------------------------|------------------|-----------------|----------------|
| Fusion          | Activating via upregulation and / or ligand-independent dimerization | FGFR2-ACLY       | FGFR2-DNAJC12   | FGFR2-NOL4     |
|                 |                                                                      | FGFR2-AFF3       | FGFR2-DSP       | FGFR2-NRAP     |
|                 |                                                                      | FGFR2-AFF4       | FGFR2-EEA1      | FGFR2-NRBF2    |
|                 |                                                                      | FGFR2-AHCYL1     | FGFR2-EIF4ENIF1 | FGFR2-OFD1     |
|                 |                                                                      | FGFR2-ARHGAP22   | FGFR2-ERC1      | FGFR2-OPTN     |
|                 |                                                                      | FGFR2-ARHGAP24   | FGFR2-FAM160B1  | FGFR2-PAH      |
|                 |                                                                      | FGFR2-ATAD2      | FGFR2-FAM67A    | FGFR2-PAWR     |
|                 |                                                                      | FGFR2-ATF2       | FGFR2-FILIP1    | FGFR2-PIBF1    |
|                 |                                                                      | FGFR2-BICC1      | FGFR2-GAB2      | FGFR2-POC1B    |
|                 |                                                                      | FGFR2-BICD1      | FGFR2-GOPC      | FGFR2-POF1B    |
|                 |                                                                      | FGFR2-CASP7      | FGFR2-INSC      | FGFR2-PPHLN1   |
|                 |                                                                      | FGFR2-CCDC158    | FGFR2-KCTD1     | FGFR2-PXN      |
|                 |                                                                      | FGFR2-CCDC170    | FGFR2-KIAA1217  | FGFR2-RABGAP1L |
|                 |                                                                      | FGFR2-CCDC6      | FGFR2-KIAA1598  | FGFR2-RASSF4   |
|                 |                                                                      | FGFR2-CDC42BPB   | FGFR2-KIAA1967  | FGFR2-ROBO2    |
|                 |                                                                      | FGFR2-CEP128     | FGFR2-MACF1     | FGFR2-RPAP3    |
|                 |                                                                      | FGFR2-CIT        | FGFR2-MATR3     | FGFR2-SFI1     |
|                 |                                                                      | FGFR2-COL16A1    | FGFR2-MCU       | FGFR2-SHROOM3  |
|                 |                                                                      | FGFR2-CTNNA3     | FGFR2-MGEA5     | FGFR2-SLMAP    |
|                 |                                                                      | FGFR2-DBP        | FGFR2-NEDD4L    | FGFR2-SOGA1    |
|                 |                                                                      | FGFR2-SORBS1     | FGFR2-TBC1D1    | FGFR2-USP10    |
|                 |                                                                      | FGFR2-SPERT      | FGFR2-TCTN3     | FGFR2-VCL      |
|                 |                                                                      | FGFR2-SPICE1     | FGFR2-TFEC      | FGFR2-WAC      |
|                 |                                                                      | FGFR2-STRN4      | FGFR2-TRIM8     | FGFR2-WDHD1    |
|                 |                                                                      | FGFR2-TACC1      | FGFR2-TTC28     | FGFR2-ZMYM4    |
|                 |                                                                      | FGFR2-TACC2      | FGFR2-TXLNB     | FGFR2-ZNF521   |
|                 |                                                                      | FGFR2-TACC3      | FGFR2-USH2A     |                |

| Alteration Type    | Functional Description                   | FGFR2 Alteration |                  |                  |
|--------------------|------------------------------------------|------------------|------------------|------------------|
| Insertion-Deletion | Extracellular domain activating mutation | H167_N173del     | P170_K176del     | P256_G261delinsR |
|                    |                                          | P263_A266del     | T268_D273delinsS | V280_K292del     |
|                    |                                          | P286_K292del     | I288_E295delinsT | W290_I291delinsC |
| Missense           | Activating Loop                          | K659M            | K659N            |                  |
|                    | Extracellular domain activating mutation | D101Y            | P253R            | T341P            |
|                    |                                          | R203C            | F276C            | S372C            |
|                    |                                          | R251Q            | W290R            | Y375C            |
|                    |                                          | S252W            |                  |                  |
|                    | Gatekeeper                               | V564F            | V564I            | V564L            |
|                    | Molecular Brake / Regulatory Triad       | N549H            | N549T            | K641N            |
|                    |                                          | N549K            | E565G            | K641R            |
|                    |                                          | N549S            | E565A            |                  |
|                    | Other kinase domain activating mutations | K526E            | V562L            | R678G            |
|                    |                                          | M535I            | L617F            | H682L            |
|                    |                                          | M537I            | L617M            | K714R            |
|                    |                                          | M538I            | L617V            | E731K            |
|                    |                                          | I547V            |                  |                  |
|                    | Transmembrane domain activating mutation | Y381D            | C382R            | M391R            |
| Duplication        | Extracellular domain activating mutation | S267_D273dup     |                  |                  |

Note: Amino acid positions based on RefSeq NM\_000141.

#### Pathogenic / Likely-pathogenic FGFR3 Gene Alterations

| Alteration Type | Functional Description                                               | FGFR3 Alteration |                |           |
|-----------------|----------------------------------------------------------------------|------------------|----------------|-----------|
| Fusion          | Activating via upregulation and / or ligand-independent dimerization | FGFR3-TACC3      | FGFR3-BAIAP2L1 | IGH-FGFR3 |
| Missense        | Extracellular domain activating mutation                             | R248C            | G370C          | Y373C     |
|                 |                                                                      | S249C            | S371C          | G375C     |
|                 | Gatekeeper                                                           | V555M            |                |           |
|                 | Molecular Brake                                                      | N540K            | N540S          |           |
|                 | Activating Loop                                                      | K650E            | K650R          | K650N     |
|                 |                                                                      | K650Q            | K650M          | K650T     |
|                 | M528I                                                                | D641G            | Y647C          |           |

| Alteration Type | Functional Description                   | FGFR3 Alteration |       |       |
|-----------------|------------------------------------------|------------------|-------|-------|
|                 | Other kinase domain activating mutations | I538V            | D641N | R669G |
|                 | Transmembrane domain activating mutation | G380R            | G382D | A391E |

Note: Amino acid positions based on RefSeq NM\_000142.
