# Supplementary material for: A Phase I Study of KIN-3248, an Irreversible Small-molecule Pan-FGFR Inhibitor, in Patients with Advanced FGFR2/3-driven Solid Tumors
Source: PubMed Central journal article supplement (PMC11060137; doi:10.1158/2767-9764.crc-24-0137), 2024-04-30
Supplement: crc-24-0137-s09.pdf [file crc-24-0137-s09.pdf]

**Supplemental Table 3: Summary of Pharmacokinetic Parameters of KIN-3248 (Cycle 1 Day 1)**

| Dose (mg)          | n  | C <sub>max</sub> (ng/mL) | C <sub>max p</sub> (ng/mL/mg) | T <sub>max</sub> (h) | AUC <sub>0-24</sub> (h*ng/ml) | AUC <sub>0-24_D</sub> (h*ng/ml/mg) | C <sub>min</sub> (ng/ml)      | t <sub>1/2</sub> (h) |
|--------------------|----|--------------------------|-------------------------------|----------------------|-------------------------------|------------------------------------|-------------------------------|----------------------|
| Geo Mean (Geo CV%) |    |                          |                               |                      |                               |                                    |                               |                      |
| 5                  | 9  | 45.9<br>(57.8%)          | 9.18<br>(57.8%)               | 1.00<br>(0.500-4.00) | 186<br>(25.8%)                | 37.2<br>(25.8%)                    | 0.825<br>(35.9%) <sup>#</sup> | 4.53<br>(65.1%)      |
| 10                 | 7  | 76.4<br>(46.5%)          | 7.64<br>(46.5%)               | 4.00<br>(1.00-4.00)  | 381<br>(29.5%)                | 38.1<br>(29.5%)                    | 1.29<br>(47.4%) <sup>†</sup>  | 3.96<br>(40.7%)      |
| 20                 | 8  | 187<br>(32.5%)           | 9.35<br>(32.5%)               | 2.00<br>(1.00-4.00)  | 845<br>(48%)                  | 42.2<br>(48%)                      | 2.03<br>(92.6%) <sup>†</sup>  | 4.03<br>(27.1%)      |
| 30                 | 16 | 268<br>(63.4%)           | 8.92<br>(63.4%)               | 1.50<br>(1.00-4.00)  | 1180<br>(31.8%) <sup>†</sup>  | 39.2<br>(31.8%) <sup>†</sup>       | 3.28<br>(110.6%) <sup>†</sup> | 4.53<br>(42.4%)      |
| 40                 | 11 | 285<br>(60.5%)           | 7.12<br>(60.5%)               | 2.00<br>(1.00-2.00)  | 1260<br>(42.2%)               | 31.5<br>(42.2%)                    | 3.63<br>(57.3%) <sup>##</sup> | 4.53<br>(42.4%)      |
