# Supplementary material for: A Phase I Study of KIN-3248, an Irreversible Small-molecule Pan-FGFR Inhibitor, in Patients with Advanced FGFR2/3-driven Solid Tumors
Source: PubMed Central journal article supplement (PMC11060137; doi:10.1158/2767-9764.crc-24-0137), 2024-04-30
Supplement: crc-24-0137-s10.pdf [file crc-24-0137-s10.pdf]

**Supplemental Table 1: FGFRi pre-treated patients with kinase domain resistance mutations identified in centrally tested ctDNA**

| Tumor Type     | Cholangiocarcinoma                                                                                                  | Cholangiocarcinoma                                                                           | Cholangiocarcinoma                                                                                                                                                                                                                        | Gastric                        |
|----------------|---------------------------------------------------------------------------------------------------------------------|----------------------------------------------------------------------------------------------|-------------------------------------------------------------------------------------------------------------------------------------------------------------------------------------------------------------------------------------------|--------------------------------|
| Primary Driver | FGFR2-BICC1 Fusion                                                                                                  | FGFR2-INA Fusion                                                                             | FGFR2-BICC1 Fusion                                                                                                                                                                                                                        | FGFR2-CTNNB1 Fusion            |
| Resistance     | FGFR2 p.E565K<br>FGFR2 p.V564F<br>FGFR2 p.E565G<br>FGFR2 p.N549H<br>FGFR2 p.V564I<br>FGFR2 p.T635I<br>FGFR2 p.K641R | FGFR2 p.N549K<br>FGFR2 p.V564F<br>FGFR2 p.M537_M538delinsL<br>FGFR2 p.N549H<br>FGFR2 p.M537I | FGFR2 p.L617F (c.1851G>T)<br>FGFR2 p.L617F (c.1851G>C)<br>FGFR2 p.V564I<br>FGFR2 p.M537I (c.1611G>T)<br>FGFR2 p.M537I (c.1611G>A)<br>FGFR2 p.M537I (c.1611G>C)<br>FGFR2 p.N549K (c.1647T>A)<br>FGFR2 p.N549K (c.1647T>G)<br>FGFR2 p.I548N | FGFR2 p.L617M<br>FGFR2 p.L617F |
